# Supplementary material for: Genetic diversity, variation, and structure of two populations of bigfin reef squid (Sepioteuthis lessoniana d’Orbigny) in Con Dao and Phu Quoc islands, Vietnam
Source: J Genet Eng Biotechnol. 2023 Nov 13;21:116. doi: 10.1186/s43141-023-00573-y (PMC10643773; doi:10.1186/s43141-023-00573-y)
Supplement: Supplementary file 1 — Additional file 1. [file 43141_2023_573_MOESM1_ESM.xlsx]

## Sheet: CBDP
	Con dao population																												Band number	Phu Quoc population
ID	Sles_036	Sles_037	Sles_039	Sles_040	Sles_041	Sles_042	Sles_043	Sles_044	Sles_045	Sles_046	Sles_047	Sles_048	Sles_049	Sles_052	Sles_053	Sles_054	Sles_055	Sles_057	Sles_058	Sles_060	Sles_061	Sles_062	Sles_063	Sles_064	Sles_065	Sles_067	Sles_068	Sles_070		Sles_072	Sles_073	Sles_074	Sles_075	Sles_076	Sles_077	Sles_078	Sles_079	Sles_080	Sles_081	Sles_082	Sles_083	Sles_084	Sles_085	Sles_086	Sles_087	Sles_088	Sles_089	Sles_090	Sles_091
CBDP 1_1	0	0	0	0	0	0	0	0	0	0	1	1	0	0	0	0	0	0	0	0	0	1	0	1	0	0	0	0	1	0	0	0	0	0	1	0	0	0	0	0	0	0	0	0	0	0	1	0	0
CBDP 1_2	1	1	1	1	1	1	0	0	1	1	0	1	1	1	1	1	1	0	1	1	1	1	1	1	1	1	1	1	2	1	1	1	0	0	1	1	1	1	1	1	0	0	1	1	1	1	1	1	1
CBDP 1_3	0	1	0	0	1	1	1	1	1	1	1	1	1	1	1	1	1	1	1	1	1	1	1	1	1	1	1	1	3	1	1	0	1	1	1	1	1	1	1	1	1	1	1	1	1	1	1	1	1
CBDP 1_4	1	1	1	1	1	1	1	1	1	1	1	1	1	1	1	1	1	1	1	1	1	1	1	1	1	1	1	1	4	1	1	0	1	1	1	1	1	1	1	1	1	1	1	1	1	1	1	1	1
CBDP 1_5	1	1	1	1	1	1	0	0	1	1	1	1	1	1	1	1	1	1	1	1	1	1	1	1	1	1	1	1	5	1	1	1	1	1	1	1	1	1	1	1	0	0	1	1	1	1	1	1	1
CBDP 1_6	0	0	0	0	0	0	0	0	0	0	1	0	0	0	0	0	0	0	0	0	0	0	0	0	0	0	0	0	6	0	0	0	0	0	0	0	0	0	0	0	1	0	0	0	0	0	0	0	0
CBDP 1_7	1	1	1	1	1	1	0	0	1	1	1	1	1	1	1	1	1	1	1	1	1	1	1	1	1	1	1	1	7	1	1	1	1	1	1	1	1	1	1	1	0	0	1	1	1	1	1	1	1
CBDP 1_8	0	1	0	0	1	1	1	1	1	1	1	1	1	1	1	1	1	1	1	1	1	1	1	1	1	1	1	1	8	1	0	0	1	1	1	1	1	1	1	1	1	1	1	0	1	1	1	1	1
CBDP 1_9	0	0	0	0	0	0	1	1	0	0	1	0	0	0	0	0	0	0	0	0	0	0	0	0	0	0	0	0	9	0	0	0	0	0	0	0	0	0	0	0	1	0	0	0	0	0	0	0	0
CBDP 1_10	1	1	1	1	1	1	0	0	1	1	1	1	1	1	1	1	1	1	1	1	1	1	1	1	1	1	1	1	10	1	1	1	1	1	1	1	1	1	1	1	0	0	1	1	1	1	1	1	1
CBDP 1_11	1	1	1	0	1	0	0	0	0	0	1	1	0	0	0	0	0	0	0	0	0	0	0	1	0	0	1	0	11	0	1	0	0	0	0	0	0	0	0	0	0	0	0	0	1	0	1	1	1
CBDP 1_12	0	0	0	0	0	0	1	1	0	0	1	0	0	0	0	0	0	0	0	0	0	0	0	0	0	0	0	0	12	0	0	0	0	0	0	0	0	0	0	0	1	1	0	0	0	0	0	0	0
CBDP 1_13	1	1	1	1	1	1	0	0	1	1	1	1	1	1	1	1	1	1	1	1	1	1	1	1	1	1	1	1	13	1	1	0	1	1	1	1	1	0	0	1	1	1	1	0	1	1	1	1	1
CBDP 1_14	0	0	0	0	0	0	0	0	0	0	0	0	0	0	0	0	0	1	0	0	0	0	0	0	0	0	0	0	14	0	0	0	0	0	0	0	0	0	0	0	0	0	0	0	0	0	0	1	0
CBDP 1_15	0	0	0	0	1	1	0	0	0	1	0	0	0	0	0	1	1	1	0	0	1	1	1	1	1	0	0	1	15	0	1	0	1	0	0	1	0	1	1	1	0	0	0	0	1	0	0	1	0
CBDP 2_1	0	0	0	0	0	1	0	0	0	0	1	0	1	1	1	1	1	1	1	1	1	0	1	1	1	1	1	1	16	1	0	0	1	1	1	1	0	1	0	0	0	1	1	0	0	0	0	0	0
CBDP 2_2	0	0	0	0	0	0	0	0	0	0	0	0	0	0	0	0	0	0	0	0	0	0	0	0	0	0	0	0	17	0	0	0	0	0	0	0	0	0	1	0	0	0	0	0	0	0	0	0	0
CBDP 2_3	1	0	0	0	1	1	0	0	0	1	0	1	1	1	0	1	1	1	1	1	1	1	1	1	1	1	1	1	18	1	0	0	0	1	1	1	1	1	1	1	0	0	1	1	0	0	1	1	0
CBDP 2_4	0	0	0	0	0	0	0	0	0	0	0	0	0	1	1	1	1	0	1	1	1	1	1	1	1	1	1	0	19	0	0	0	0	0	0	0	0	0	0	0	0	0	0	0	0	0	0	0	0
CBDP 2_5	0	0	0	0	0	0	1	1	0	0	1	1	1	1	1	1	1	1	1	1	1	1	1	1	1	1	1	1	20	1	0	0	0	1	1	1	1	1	1	1	1	1	1	0	0	0	0	1	0
CBDP 2_6	1	1	1	1	1	1	1	1	1	1	1	1	1	1	1	1	1	1	1	1	1	1	1	1	1	1	1	1	21	1	1	1	1	1	1	1	1	1	1	1	1	1	1	1	1	1	1	1	1
CBDP 2_7	0	0	0	0	0	1	0	0	0	0	0	1	1	1	1	1	1	1	1	1	1	0	1	1	1	1	1	1	22	1	0	0	1	1	1	1	0	0	0	0	0	0	1	1	1	1	0	1	1
CBDP 2_8	0	1	0	0	0	0	0	0	0	0	0	0	0	0	0	0	0	0	0	0	0	0	0	0	0	0	0	0	23	0	0	0	0	0	0	0	0	0	0	0	0	0	0	0	0	0	0	0	0
CBDP 2_9	1	1	1	1	1	1	0	0	1	1	1	1	1	1	1	1	1	1	1	1	1	1	1	1	1	1	1	1	24	1	1	1	1	1	1	1	1	1	1	1	1	0	1	1	1	1	1	1	1
CBDP 2_10	0	0	0	0	0	0	0	0	0	0	0	0	0	0	0	0	0	0	0	0	0	0	0	0	0	0	0	0	25	0	0	0	0	0	0	0	0	0	0	0	0	1	0	0	0	0	0	0	0
CBDP 2_11	0	1	0	0	0	0	1	1	0	0	1	0	0	0	0	0	0	0	0	0	0	0	0	0	0	0	0	0	26	0	0	0	0	0	0	0	0	0	0	0	0	1	0	0	0	0	0	0	0
CBDP 2_12	1	1	1	1	1	1	0	0	1	1	0	1	1	1	1	1	1	1	1	1	1	1	1	1	1	1	1	1	27	1	1	1	1	1	1	1	1	1	1	1	0	0	1	1	1	1	1	1	1
CBDP 2_13	0	0	0	0	0	0	1	1	0	0	1	0	0	0	0	0	0	0	0	0	0	0	0	0	0	0	0	0	28	0	0	0	0	0	0	0	0	0	0	0	1	1	0	0	0	0	0	0	0
CBDP 3_1	0	0	1	0	0	0	0	0	0	0	1	0	0	0	0	0	0	0	0	0	0	0	0	0	0	0	0	0	29	0	0	0	1	0	0	0	0	0	0	0	1	1	0	0	0	0	1	0	0
CBDP 3_2	0	0	0	0	0	1	1	1	0	0	0	1	1	1	1	1	1	0	1	1	1	1	1	1	1	1	1	1	30	1	1	1	1	1	1	1	1	1	1	0	0	0	1	1	1	0	0	1	1
CBDP 3_3	1	1	1	1	1	1	0	0	1	1	0	1	1	1	1	1	1	1	1	1	1	1	1	1	1	1	1	1	31	1	1	1	1	1	1	1	1	1	1	1	0	0	1	1	1	1	1	1	1
CBDP 3_4	0	0	0	0	0	0	1	0	0	0	1	0	0	0	0	0	0	0	0	0	0	0	0	0	0	0	0	0	32	0	0	0	0	0	0	0	0	0	0	0	1	1	0	0	0	0	0	0	0
CBDP 3_5	0	0	0	0	0	0	1	1	0	0	1	0	0	0	0	0	0	0	0	0	0	0	0	0	0	0	0	0	33	0	0	0	0	0	0	0	0	0	0	0	1	0	0	0	0	0	0	0	0
CBDP 3_6	1	1	1	1	1	1	1	1	1	1	1	1	1	1	1	1	1	1	1	1	1	1	1	1	1	1	1	1	34	1	1	1	1	1	1	1	1	1	1	1	1	1	1	1	1	1	1	1	1
CBDP 3_7	0	0	0	0	0	0	1	1	0	0	1	0	0	0	0	0	0	0	0	0	0	0	0	0	1	0	0	0	35	1	0	0	0	0	0	0	1	0	0	0	1	1	0	0	1	0	0	1	0
CBDP 3_8	1	1	1	1	1	1	1	1	1	1	1	1	1	1	1	1	1	0	1	1	1	1	1	1	1	1	0	1	36	1	1	0	1	1	0	1	0	1	1	1	0	0	1	1	1	0	0	1	1
CBDP 3_9	0	0	0	0	0	0	0	0	0	0	0	0	0	0	0	0	0	1	0	0	1	0	0	0	0	0	1	0	37	0	1	0	1	0	0	0	0	0	0	0	0	0	0	1	0	0	0	1	1
CBDP 3_10	1	1	1	1	1	1	1	1	1	1	1	1	1	1	1	1	1	1	1	1	1	1	1	1	1	1	1	1	38	1	1	1	1	1	1	1	1	1	1	1	1	1	1	1	1	1	1	1	1
CBDP 3_11	1	1	1	1	1	1	1	0	1	1	1	1	1	1	1	1	1	1	1	1	1	1	1	1	1	1	1	1	39	1	1	1	1	1	1	1	1	1	1	1	1	0	1	1	1	1	0	1	1
CBDP 3_12	0	0	0	0	0	0	0	1	0	0	1	0	0	0	0	0	0	0	0	0	0	0	0	0	0	0	0	0	40	0	0	0	0	0	0	0	0	0	0	0	0	1	0	0	0	0	0	0	0
CBDP 3_13	0	0	0	0	1	1	1	1	1	1	1	1	1	1	1	1	1	1	1	1	1	1	1	1	1	1	1	1	41	1	1	0	1	1	1	1	1	1	1	1	1	1	1	1	1	1	1	1	1
CBDP 4_1	1	1	0	1	1	1	0	0	1	1	0	1	1	1	1	1	1	1	1	1	1	0	1	1	1	1	1	1	42	1	1	1	1	1	1	1	1	1	1	1	0	0	1	1	1	1	1	1	1
CBDP 4_2	0	0	0	0	0	0	0	0	1	1	0	1	1	1	1	1	1	1	1	1	1	1	1	1	1	1	1	1	43	1	1	1	1	1	1	1	1	1	1	1	0	0	1	1	1	1	1	1	1
CBDP 4_3	0	0	0	0	0	0	0	0	1	0	0	0	0	1	0	1	0	0	1	1	0	0	1	1	1	1	1	1	44	1	1	1	1	1	1	1	1	1	1	1	0	0	1	0	1	0	1	1	1
CBDP 4_4	0	0	0	0	0	0	0	0	0	0	0	0	0	1	0	1	0	0	0	0	0	0	0	1	0	0	0	0	45	0	1	0	0	0	0	0	0	1	1	1	0	0	0	0	0	0	0	1	0
CBDP 4_5	1	1	1	1	1	1	0	0	1	1	1	1	1	1	1	1	1	1	1	1	1	1	1	1	1	1	1	1	46	1	1	1	1	1	1	1	1	1	1	1	0	0	1	1	1	1	1	1	1
CBDP 4_6	0	0	0	0	0	0	1	1	0	0	1	0	0	0	0	0	0	0	0	0	0	0	0	0	0	0	0	0	47	0	0	0	0	0	0	0	0	0	0	0	1	1	0	0	0	0	0	0	0
CBDP 4_7	1	1	1	1	1	1	1	1	1	1	1	1	1	1	1	1	1	1	1	1	1	1	1	1	1	1	1	1	48	1	1	1	1	1	1	1	1	1	1	1	0	0	1	1	1	1	1	1	1
CBDP 4_8	1	1	1	1	1	1	0	0	1	1	0	1	1	1	1	1	1	1	1	1	1	1	1	1	1	1	1	1	49	1	1	1	1	1	1	1	1	1	1	1	0	0	1	1	1	1	1	1	1
CBDP 4_9	1	0	0	0	1	0	0	0	1	1	0	0	1	0	1	0	0	0	0	0	0	0	1	0	0	0	0	0	50	0	1	0	0	0	0	0	1	0	0	1	0	0	0	1	0	0	0	0	0
CBDP 4_10	1	1	1	1	1	1	1	1	1	1	1	1	1	1	1	1	1	1	1	1	1	1	1	1	1	1	1	1	51	1	1	1	1	1	1	1	1	1	1	1	1	1	1	1	1	1	1	1	1
CBDP 4_11	0	0	0	0	0	0	0	0	0	0	1	0	0	0	0	0	0	0	0	0	0	0	0	0	0	0	0	0	52	0	0	0	0	0	0	0	0	0	0	0	0	0	0	0	0	0	0	0	0
CBDP 5_1	0	0	0	0	0	0	0	0	0	0	0	0	0	0	0	0	0	0	0	0	0	0	0	0	0	0	0	0	53	0	0	0	0	0	0	0	0	0	0	0	1	0	0	0	0	0	0	0	0
CBDP 5_2	1	1	1	0	1	1	0	1	1	1	1	1	0	1	1	1	1	1	1	1	1	1	1	1	0	1	1	1	54	1	1	1	1	0	1	1	1	1	1	1	0	1	1	0	1	1	0	1	1
CBDP 5_3	0	0	0	0	0	0	1	1	0	0	1	0	0	0	0	0	0	0	0	0	0	0	0	0	0	0	0	0	55	0	0	0	0	0	0	0	0	0	0	0	1	0	0	0	0	0	0	0	0
CBDP 5_4	0	1	1	0	1	1	0	0	0	1	1	1	1	1	1	1	1	1	1	1	1	1	1	1	0	1	1	1	56	1	1	0	0	1	1	1	1	1	1	0	1	1	1	1	1	1	1	1	0
CBDP 5_5	1	1	1	1	1	1	0	1	1	1	1	1	1	1	1	1	1	1	1	1	1	0	1	1	1	1	1	1	57	1	1	1	1	1	1	1	1	1	1	1	1	0	1	1	1	1	1	1	1
CBDP 5_6	1	1	1	1	1	1	0	1	1	1	1	1	1	1	1	1	1	1	1	1	1	1	1	1	1	1	1	1	58	1	1	1	1	1	1	1	1	1	1	1	1	1	1	1	1	1	1	1	1
CBDP 5_7	0	0	0	0	0	0	1	1	0	0	1	0	0	0	0	0	0	0	0	0	0	0	0	0	0	0	0	0	59	0	0	0	0	0	0	0	0	0	0	0	1	1	0	0	0	0	0	0	0
CBDP 5_8	1	1	1	1	1	1	1	1	1	1	1	1	1	1	1	1	1	1	1	1	1	1	1	1	1	1	1	1	60	1	1	1	1	1	1	1	1	1	1	1	1	1	1	1	1	1	1	1	1
CBDP 5_9	0	0	0	0	0	0	0	0	0	0	0	0	0	0	0	0	0	0	0	0	0	0	0	1	0	0	0	0	61	0	0	0	0	0	0	0	0	0	0	0	0	0	0	0	0	0	0	0	0
CBDP 5_10	0	0	0	0	0	0	0	0	0	0	0	0	1	0	0	1	0	1	0	1	0	1	1	1	1	1	1	1	62	0	0	1	0	0	0	0	0	0	0	0	0	0	0	1	0	0	0	0	1
CBDP 5_11	1	1	0	1	1	1	1	0	1	1	1	1	1	1	1	0	1	1	1	1	1	1	1	1	1	1	1	1	63	1	1	1	1	1	1	1	1	1	1	1	0	0	1	1	1	1	1	1	1
CBDP 5_12	0	0	0	0	0	0	0	1	0	0	1	0	0	0	0	0	0	1	0	0	0	0	0	0	0	0	0	0	64	0	0	0	0	0	0	0	0	0	0	0	1	1	0	0	0	0	0	0	0
CBDP 5_13	0	0	0	0	0	0	1	1	0	0	1	0	0	0	0	0	0	0	0	0	0	0	0	0	0	0	0	0	65	0	0	0	0	0	0	0	0	0	0	0	1	1	0	0	0	0	0	0	0
CBDP 5_14	1	1	1	1	1	1	1	1	1	1	1	1	1	1	1	1	1	1	1	1	1	1	1	1	1	1	1	1	66	1	1	0	1	1	1	1	1	1	1	1	1	1	1	0	1	1	0	1	1
CBDP 5_15	1	1	0	0	1	1	1	1	1	1	1	1	1	1	1	1	1	1	1	1	1	1	1	1	1	1	1	1	67	1	1	0	1	1	1	1	1	1	1	1	1	1	1	0	1	1	0	1	1
CBDP 6_1	0	0	0	0	0	0	1	1	0	0	1	1	1	1	1	1	1	1	0	0	0	0	0	0	0	0	0	0	68	0	1	0	0	1	1	1	0	0	0	0	1	1	0	0	0	0	0	0	0
CBDP 6_2	0	0	0	1	1	0	1	0	0	0	0	0	0	0	0	1	1	0	0	1	1	1	1	1	1	1	1	1	69	0	0	0	0	0	0	0	0	0	0	0	0	0	0	0	0	0	0	0	0
CBDP 6_3	0	0	0	0	0	1	0	0	1	0	0	1	1	1	1	1	1	0	1	1	1	0	1	1	1	1	1	1	70	1	1	1	1	1	1	1	0	1	1	1	0	0	0	1	1	1	0	1	1
CBDP 6_4	0	1	0	1	1	1	1	1	1	1	1	1	1	1	1	1	1	1	1	1	1	1	1	1	1	1	1	1	71	1	1	1	1	1	1	1	0	1	1	1	1	1	1	1	1	1	0	1	1
CBDP 6_5	0	0	0	0	0	0	0	0	0	0	0	0	0	1	1	0	0	0	0	0	0	0	0	0	0	0	0	0	72	0	0	0	0	1	0	0	0	1	1	0	0	0	0	1	1	0	0	0	0
CBDP 6_6	1	1	1	1	1	1	0	0	1	1	1	1	1	1	1	1	1	1	1	1	1	1	1	1	1	1	1	1	73	1	0	0	1	1	1	1	0	1	1	1	0	0	1	1	1	1	0	1	1
CBDP 6_7	0	0	0	0	0	0	0	0	1	1	1	1	1	1	1	1	1	1	1	1	1	0	1	1	1	1	1	1	74	1	1	1	1	1	1	1	0	1	1	1	1	0	1	1	1	1	0	1	1
CBDP 6_8	0	0	0	0	0	0	1	1	0	0	1	0	0	0	0	0	1	0	1	0	1	0	0	0	0	0	0	0	75	0	0	0	0	0	0	0	0	0	0	0	1	1	0	0	0	0	0	0	0
CBDP 6_9	1	1	1	1	1	1	1	1	1	1	1	1	1	1	1	1	1	1	1	1	1	1	1	1	1	1	1	1	76	1	1	1	1	1	1	1	1	1	1	1	1	1	1	1	1	1	1	1	1
CBDP 6_10	1	1	1	1	1	1	1	1	1	1	1	1	1	1	1	1	1	1	1	1	1	1	1	1	1	1	1	1	77	1	1	1	1	1	1	1	1	1	1	1	1	1	1	1	1	1	1	1	1
CBDP 6_11	0	1	0	1	0	1	0	0	1	1	0	1	1	1	1	1	1	1	1	1	1	1	1	1	1	1	1	1	78	1	0	1	1	1	1	0	0	1	1	1	0	0	1	1	1	1	0	1	1
CBDP 7_1	0	0	0	0	0	0	0	0	0	0	0	0	0	1	1	0	0	0	0	0	0	0	0	0	1	1	1	1	79	0	0	0	0	1	0	0	0	0	0	0	0	0	0	0	0	0	0	0	0
CBDP 7_2	0	0	0	0	1	1	0	0	1	1	1	1	1	1	1	1	1	1	1	1	1	1	1	1	1	1	1	1	80	1	1	0	1	1	1	1	0	1	1	1	0	0	1	1	1	1	1	1	0
CBDP 7_3	1	0	0	0	1	0	0	0	0	0	0	0	0	0	0	0	0	0	0	0	0	0	0	0	0	0	0	0	81	0	0	0	0	1	0	0	0	0	0	0	0	0	0	0	0	1	0	0	0
CBDP 7_4	1	1	0	0	1	1	1	1	1	1	1	1	1	1	1	1	1	1	1	1	1	1	1	1	1	1	1	1	82	1	1	0	1	1	1	1	1	1	1	1	0	0	1	1	1	1	1	1	0
CBDP 7_5	1	0	0	0	1	1	0	1	1	1	0	1	1	1	1	1	1	1	1	1	1	1	1	1	1	1	1	1	83	1	1	0	1	1	1	1	1	1	1	1	1	1	1	1	1	1	1	1	0
CBDP 7_6	0	0	0	0	0	0	1	0	0	0	1	0	0	0	0	0	0	0	0	0	0	0	0	0	0	0	0	0	84	0	0	0	0	0	0	0	0	0	0	0	1	1	0	0	0	0	0	0	0
CBDP 7_7	1	1	0	0	1	1	1	0	1	1	1	1	1	1	1	1	1	1	1	1	1	1	1	1	1	1	1	1	85	1	1	1	1	1	1	1	1	1	1	1	0	0	1	1	1	1	1	1	0
CBDP 7_8	1	0	0	0	1	1	1	1	1	1	1	0	1	1	1	1	1	1	1	1	1	0	1	1	1	1	1	1	86	1	0	0	0	1	1	1	0	1	1	1	1	1	1	1	1	1	0	1	0
CBDP 7_9	0	0	0	0	1	1	0	0	0	0	0	0	1	1	0	0	1	0	0	0	1	0	1	1	0	0	0	0	87	0	0	0	0	1	1	1	0	1	1	1	1	1	1	1	1	1	0	0	0
CBDP 7_10	0	1	1	1	0	0	0	0	0	0	0	0	0	0	0	0	0	0	0	0	0	0	0	0	0	0	0	0	88	0	0	1	0	0	0	0	1	0	0	0	0	0	0	0	0	0	0	0	1
CBDP 7_11	0	0	0	0	0	0	1	1	0	1	1	0	1	1	1	1	1	0	1	1	1	0	1	1	1	1	1	0	89	0	0	0	0	1	1	1	0	1	1	0	0	0	1	1	1	1	1	1	0
CBDP 7_12	0	1	1	1	0	0	0	0	0	0	0	0	0	0	0	0	0	0	0	0	0	0	0	0	0	0	0	0	90	0	0	1	0	0	0	0	1	0	0	0	0	0	0	0	0	0	0	0	1
CBDP 7_13	0	1	1	1	0	0	0	0	0	0	0	0	0	0	0	0	0	0	0	0	0	0	0	0	0	0	0	0	91	0	0	1	0	0	0	0	1	0	0	0	0	0	0	0	0	0	0	0	1
CBDP 8_1	0	0	0	0	0	0	0	0	0	0	0	0	0	0	0	0	0	0	0	0	0	0	0	0	0	0	0	0	92	0	0	1	0	0	0	0	0	0	0	0	0	0	0	0	0	0	0	0	0
CBDP 8_2	0	0	0	0	0	1	0	0	1	0	0	0	0	0	0	1	0	0	0	1	0	0	1	0	0	0	0	0	93	0	0	0	0	0	0	0	1	0	0	0	0	0	0	0	0	0	0	0	0
CBDP 8_3	0	0	0	0	0	0	0	0	0	0	0	0	0	0	0	0	0	0	0	0	0	0	0	1	0	0	0	0	94	0	0	1	0	0	0	0	0	0	0	0	0	0	0	0	0	0	0	0	0
CBDP 8_4	0	0	0	0	1	1	1	1	0	1	1	0	1	1	1	1	1	1	1	1	1	1	1	1	1	1	1	1	95	1	1	1	1	1	1	1	1	1	1	0	1	1	1	1	1	0	0	1	0
CBDP 8_5	0	0	0	0	0	0	0	0	0	0	0	0	0	0	0	0	0	0	0	0	0	0	0	0	0	0	0	0	96	0	0	1	0	0	0	0	0	0	0	0	0	0	0	0	0	0	0	0	0
CBDP 8_6	1	1	1	1	1	1	1	1	1	1	1	1	1	1	1	1	1	1	1	1	1	1	1	1	1	1	1	1	97	1	1	1	1	1	1	1	1	1	1	1	1	1	1	1	1	1	1	1	1
CBDP 8_7	0	0	0	0	0	0	0	0	0	0	0	0	0	0	0	0	0	0	0	0	0	0	0	0	0	0	0	1	98	0	0	1	0	0	0	0	0	0	0	0	0	0	0	0	0	0	0	0	0
CBDP 8_8	1	0	0	1	1	1	0	0	1	1	0	1	1	1	1	1	1	1	1	1	1	1	1	1	1	1	1	1	99	1	1	1	1	1	1	1	1	1	1	1	0	0	1	1	1	0	0	1	0
CBDP 8_9	1	1	1	1	1	1	1	1	1	1	1	1	1	1	1	1	1	1	1	1	1	1	1	1	1	1	1	1	100	1	1	1	1	1	1	1	1	1	1	1	1	1	1	1	1	1	1	1	1
CBDP 8_10	0	0	0	0	0	0	0	0	0	0	0	0	0	0	0	0	0	0	0	0	0	0	0	0	0	0	0	1	101	0	0	0	0	0	0	0	0	0	0	0	0	0	0	0	0	0	0	0	0
CBDP 8_11	1	1	1	1	1	1	0	0	1	1	0	1	1	1	1	1	1	1	1	1	1	1	1	1	1	1	1	1	102	1	1	0	1	1	1	1	1	1	1	1	0	0	1	1	1	1	1	1	0
CBDP 8_12	0	0	0	0	1	1	1	1	1	1	1	1	1	1	1	1	1	1	1	1	1	1	1	1	1	1	1	1	103	0	1	0	0	0	0	0	0	0	0	0	1	1	1	1	1	1	1	1	1
CBDP 8_13	0	0	0	0	1	1	1	1	0	1	1	1	1	1	1	1	1	1	1	1	1	1	1	1	1	1	1	0	104	0	1	0	0	0	0	0	0	0	0	0	0	0	0	0	0	0	0	0	0
CBDP 9_1	0	0	0	0	0	0	0	0	0	0	0	0	0	0	0	0	0	0	0	1	0	0	1	0	0	0	0	0	105	0	0	0	0	0	0	0	1	0	0	0	0	0	0	0	0	0	0	0	0
CBDP 9_2	0	0	0	0	0	0	1	1	0	0	1	0	0	0	0	0	1	0	0	0	0	0	0	0	0	0	0	0	106	0	0	0	0	1	0	0	0	0	0	0	1	1	1	0	1	0	0	0	0
CBDP 9_3	1	1	1	1	1	1	1	1	1	1	1	1	1	1	1	1	1	1	1	1	1	1	1	1	1	1	1	1	107	1	1	1	1	1	1	1	1	1	1	1	1	1	1	1	1	1	1	1	1
CBDP 9_4	0	0	0	0	0	0	0	0	0	0	0	0	0	0	0	0	1	0	0	0	1	0	0	0	1	1	1	1	108	0	0	0	0	1	1	1	1	1	1	0	0	0	1	0	1	0	0	0	0
CBDP 9_5	1	1	1	1	0	1	0	0	1	1	1	1	1	1	1	1	1	1	1	1	1	1	1	1	1	1	1	1	109	1	1	1	1	1	1	1	1	1	1	1	0	0	1	0	0	1	1	1	1
CBDP 9_6	0	0	0	1	0	0	0	0	0	0	0	0	0	0	0	0	0	0	0	0	0	0	0	0	0	0	0	1	110	0	0	0	0	0	0	0	0	0	0	0	0	0	0	0	0	0	0	0	0
CBDP 9_7	0	0	1	1	1	1	0	0	1	1	0	1	1	1	1	1	1	1	1	1	1	1	1	1	1	1	1	1	111	1	1	1	1	1	1	1	1	1	1	1	0	0	1	1	1	1	1	1	1
CBDP 9_8	0	0	0	1	0	0	1	1	0	0	1	0	0	0	0	0	0	0	0	0	0	1	0	0	0	0	0	0	112	0	0	0	0	0	0	0	0	0	0	1	0	0	1	1	1	1	1	1	1
CBDP 9_9	0	0	0	0	0	0	0	0	0	0	0	0	0	0	0	0	0	0	0	0	0	1	0	0	0	0	0	0	113	0	0	0	0	0	0	0	0	0	0	1	0	0	0	0	0	0	0	0	0
CBDP 10_1	1	1	1	1	1	1	1	1	1	1	1	1	1	1	1	1	1	1	1	1	1	1	1	1	1	1	1	1	114	1	1	1	1	1	1	1	1	1	1	1	1	1	1	1	1	1	0	1	1
CBDP 10_2	1	1	1	1	1	1	0	0	1	1	1	1	1	1	1	1	1	1	1	1	1	1	1	1	1	1	1	1	115	1	1	1	1	1	1	1	1	1	1	1	0	0	1	1	1	1	1	1	1
CBDP 10_3	0	0	0	0	0	0	0	0	0	0	0	0	0	0	0	0	0	0	0	0	0	0	0	0	0	0	0	0	116	0	0	0	0	0	0	0	0	0	0	0	0	1	0	0	0	0	0	0	0
CBDP 10_4	1	1	1	1	1	1	1	1	1	1	1	1	1	1	1	1	1	1	1	1	1	1	1	1	1	1	1	1	117	1	1	1	1	1	1	1	1	1	1	1	1	1	1	1	1	1	1	1	1
CBDP 10_5	1	1	1	1	1	1	1	1	1	1	1	1	1	1	1	1	1	1	1	1	1	1	1	1	1	1	1	1	118	1	1	1	1	1	1	1	1	1	1	1	1	1	1	1	1	1	0	1	1
CBDP 10_6	1	1	1	1	1	1	0	0	1	1	1	1	1	1	1	1	1	1	1	1	1	1	1	1	1	1	1	1	119	1	1	1	1	1	1	1	1	1	1	1	0	0	1	1	1	1	1	1	1
CBDP 10_7	1	1	1	1	1	1	1	1	1	1	1	1	1	1	1	1	1	1	1	1	1	1	1	1	1	1	1	1	120	1	1	1	1	1	1	1	1	1	1	0	1	1	1	1	1	1	0	1	1
CBDP 10_8	0	0	0	0	0	0	0	0	1	0	0	0	0	0	1	0	0	0	0	0	0	0	0	0	0	0	0	0	121	0	0	0	0	1	0	0	0	0	0	0	0	0	0	0	0	0	0	1	0
CBDP 10_9	0	1	1	1	1	0	1	1	0	0	1	0	0	0	1	0	0	0	0	1	0	0	0	0	0	0	0	0	122	0	0	1	1	0	0	0	1	0	1	0	1	1	1	1	1	1	1	1	1
CBDP 10_10	0	1	0	0	0	0	0	0	0	0	0	1	0	0	0	0	0	1	0	0	0	1	1	0	0	0	0	0	123	0	0	0	0	0	0	0	1	0	1	0	0	0	1	1	0	0	0	1	1
CBDP 10_11	1	1	1	1	1	1	1	1	1	1	1	1	1	1	1	1	1	1	1	1	1	1	1	1	1	1	1	1	124	1	1	1	1	1	1	1	1	1	1	1	1	1	1	1	1	1	1	1	1
CBDP 10_12	1	1	1	1	1	1	1	1	1	1	1	1	1	1	1	1	1	1	1	1	1	1	1	1	1	1	1	1	125	1	1	1	1	1	1	1	1	1	1	1	1	1	1	1	1	1	1	1	1
CBDP 10_13	1	1	1	1	1	1	0	0	1	1	0	1	1	1	1	1	1	1	1	1	1	1	1	1	1	1	1	1	126	1	1	1	1	1	1	1	1	1	1	1	0	0	1	1	1	1	1	1	1
CBDP 10_14	0	0	0	0	0	0	1	1	0	0	1	0	0	0	0	0	0	0	0	0	0	0	0	0	0	0	0	0	127	0	0	0	0	0	0	0	0	0	0	0	1	1	0	0	0	0	0	0	0
[truncated: 11 more columns]

## Sheet: SCoT
	Con Dao population																												Band	Phu Quoc population
ID	Sles_036	Sles_037	Sles_039	Sles_040	Sles_041	Sles_042	Sles_043	Sles_044	Sles_045	Sles_046	Sles_047	Sles_048	Sles_049	Sles_052	Sles_053	Sles_054	Sles_055	Sles_057	Sles_058	Sles_060	Sles_061	Sles_062	Sles_063	Sles_064	Sles_065	Sles_067	Sles_068	Sles_070		Sles_072	Sles_073	Sles_074	Sles_075	Sles_076	Sles_077	Sles_078	Sles_079	Sles_080	Sles_081	Sles_082	Sles_083	Sles_084	Sles_085	Sles_086	Sles_087	Sles_088	Sles_089	Sles_090	Sles_091
SCoT 6_1	0	1	0	0	1	0	0	0	0	0	0	0	0	0	0	0	0	0	0	0	0	1	0	0	0	0	0	0	1	0	0	0	0	0	0	0	1	1	0	1	0	0	0	1	0	0	0	0	0
SCoT 6_2	1	0	0	0	0	1	0	0	1	0	1	1	0	1	0	0	1	1	0	0	1	1	1	1	0	0	1	1	2	0	0	0	0	1	1	1	1	1	1	1	1	1	1	1	1	1	0	0	0
SCoT 6_3	0	0	0	0	0	1	1	1	1	1	1	1	1	1	1	1	1	1	1	1	1	1	1	1	1	1	1	1	3	1	1	1	1	1	1	1	1	1	1	1	1	1	1	1	1	1	1	1	1
SCoT 6_4	0	0	0	0	1	1	1	1	1	0	1	1	1	1	1	1	1	1	1	1	1	1	1	1	1	1	1	1	4	1	1	1	1	1	1	1	1	1	1	1	1	1	1	1	1	1	1	1	1
SCoT 6_5	0	0	0	0	0	0	1	1	1	1	1	1	1	1	1	1	1	1	1	1	1	1	1	1	1	1	1	1	5	1	1	1	1	1	1	1	1	1	1	1	1	1	1	1	1	1	1	1	1
SCoT 6_6	0	0	0	0	0	0	1	0	0	0	1	1	1	1	0	0	0	0	0	0	0	0	0	0	0	0	0	0	6	0	0	0	0	0	0	0	0	0	0	0	0	1	0	0	0	0	0	0	0
SCoT 6_7	0	0	0	0	0	0	0	0	0	0	0	0	1	0	1	1	1	0	0	0	0	0	0	0	0	1	0	0	7	1	0	0	0	0	1	1	0	0	0	1	1	1	0	0	0	0	0	0	0
SCoT 6_8	1	1	1	1	1	1	1	1	1	1	1	1	1	1	1	1	1	1	1	1	1	1	1	1	1	1	1	1	8	1	1	1	1	1	1	1	1	1	1	1	0	0	1	1	1	1	1	1	1
SCoT 6_9	1	1	1	1	1	1	1	1	1	1	1	1	1	1	1	1	1	1	1	1	1	1	1	1	1	1	1	1	9	1	1	1	1	1	1	1	1	1	1	1	1	1	1	1	1	1	1	1	1
SCoT 6_10	1	1	1	1	1	1	1	1	1	1	1	1	1	1	1	1	1	1	1	1	1	1	1	1	1	1	1	1	10	1	1	1	1	1	1	1	1	1	1	1	1	1	1	1	1	1	1	1	1
SCoT 6_11	1	1	1	1	1	1	1	1	1	1	1	1	1	1	1	1	1	1	1	1	1	1	1	1	1	1	1	1	11	1	1	1	1	1	1	1	1	1	1	1	1	1	1	1	1	1	1	1	1
SCoT 6_12	1	1	1	1	1	1	1	1	1	1	1	1	1	1	1	1	1	1	1	1	1	1	1	1	1	1	1	1	12	1	1	1	1	1	1	1	1	1	1	1	1	1	1	1	1	1	1	1	1
SCoT 6_13	0	1	1	0	1	1	1	1	1	1	1	1	1	1	1	0	1	1	1	1	1	1	1	1	1	1	1	1	13	0	0	1	1	1	0	0	0	1	0	0	0	1	1	0	1	1	1	1	0
SCoT 6_14	0	0	0	0	0	0	0	0	0	0	0	0	0	0	0	0	0	0	0	0	0	0	0	0	0	1	0	0	14	0	0	0	0	1	1	1	1	0	0	0	0	0	0	0	0	0	0	0	0
SCoT 6_15	0	0	0	0	0	0	0	0	0	0	1	0	0	0	0	0	0	0	0	0	0	0	0	0	0	0	0	0	15	0	0	0	0	0	0	0	0	0	0	0	0	0	0	0	0	0	0	0	0
SCoT 6_16	0	0	0	0	1	0	0	0	0	0	0	0	0	0	0	0	0	0	1	1	1	0	0	0	0	0	0	0	16	0	0	0	0	0	0	0	1	0	0	0	0	0	0	0	0	0	0	0	0
SCoT 6_17	0	0	0	0	0	0	1	1	0	0	0	0	0	0	0	0	0	0	0	0	0	0	0	0	0	0	0	0	17	0	0	0	0	0	0	0	0	0	0	0	0	0	0	0	0	0	0	0	0
SCoT 6_18	0	0	0	0	0	0	0	0	0	0	1	0	0	0	0	0	0	0	0	0	0	0	0	0	0	0	0	0	18	0	0	0	0	0	0	0	0	0	0	0	1	0	0	0	0	0	0	0	0
SCoT 9_1	0	0	0	0	0	0	0	0	0	0	0	0	0	1	1	0	1	0	0	0	1	0	0	0	0	0	0	0	19	0	0	0	0	1	0	0	0	0	0	0	0	0	0	0	0	0	0	0	0
SCoT 9_2	0	0	0	0	0	0	0	1	1	1	1	1	1	1	1	1	1	0	0	1	1	0	1	1	1	1	1	1	20	1	1	0	0	1	1	1	1	1	1	0	0	0	0	0	0	0	0	0	0
SCoT 9_3	0	0	0	0	0	1	0	0	0	0	1	0	0	0	0	0	0	0	0	0	0	0	0	0	0	0	0	0	21	0	0	0	0	0	0	0	0	0	0	0	0	0	0	0	0	0	0	0	0
SCoT 9_4	0	0	0	0	0	1	0	0	0	0	1	0	1	1	0	0	1	0	0	0	0	1	0	0	1	1	1	0	22	0	0	0	0	0	0	0	0	0	0	0	0	0	0	0	0	0	0	0	0
SCoT 9_5	0	0	0	0	0	0	0	1	0	0	1	0	0	1	1	1	1	1	1	1	1	0	0	1	1	1	1	1	23	1	1	1	1	1	0	0	1	1	1	0	1	1	1	1	1	0	0	0	0
SCoT 9_6	0	0	0	0	0	0	0	0	0	0	0	1	1	1	1	1	1	1	1	1	1	1	1	1	1	1	1	1	24	1	1	1	1	1	0	0	0	0	0	0	1	1	0	0	0	0	0	0	0
SCoT 9_7	0	0	1	0	0	0	0	0	0	0	0	0	0	0	0	0	0	0	0	0	0	0	0	0	0	0	0	0	25	0	0	0	0	0	0	0	0	0	0	0	0	0	0	0	0	0	0	0	0
SCoT 9_8	0	0	0	0	0	0	0	1	0	0	1	0	0	0	0	0	0	0	0	0	0	0	0	0	0	0	0	0	26	0	0	0	0	0	0	0	0	0	0	0	1	1	0	0	0	0	0	0	0
SCoT 9_9	1	1	1	1	1	1	1	0	1	1	0	1	1	1	1	1	1	1	1	1	1	1	1	1	1	1	1	1	27	1	1	1	1	1	1	1	1	1	1	1	1	0	1	1	1	1	1	1	1
SCoT 9_10	1	1	1	1	1	1	0	0	1	1	0	1	0	1	1	1	1	1	1	1	0	1	1	1	1	1	1	1	28	1	1	1	1	1	1	1	1	1	1	1	1	1	1	1	1	1	1	0	1
SCoT 9_11	1	1	1	1	1	1	0	1	1	1	1	1	1	1	1	1	1	0	1	1	1	1	1	1	1	1	1	1	29	0	0	1	1	1	1	1	1	1	1	0	1	1	1	1	1	1	0	1	1
SCoT 9_12	1	1	1	1	1	1	0	1	0	0	1	0	0	0	0	0	0	0	0	0	0	1	0	0	0	0	0	0	30	0	0	1	1	0	0	0	0	0	0	0	1	1	0	0	0	0	0	0	0
SCoT 9_13	0	0	0	0	0	0	0	1	0	0	1	0	0	0	0	0	0	0	0	0	0	1	0	0	0	0	0	0	31	0	0	1	1	1	0	0	0	0	0	0	1	1	0	0	0	0	0	0	0
SCoT 9_14	0	0	0	0	0	0	0	0	0	0	0	0	0	0	0	0	0	0	0	0	0	1	0	0	0	0	0	0	32	0	0	0	0	0	0	0	0	0	0	0	0	0	0	0	0	0	0	0	0
SCoT 9_15	1	0	1	0	0	0	0	0	0	0	0	0	0	0	0	0	0	0	0	0	0	0	0	0	0	0	0	0	33	0	0	0	0	0	0	0	0	0	0	0	0	0	0	0	0	0	0	0	0
SCoT 12_1	1	1	0	0	1	1	1	1	1	1	1	1	1	1	1	1	1	1	1	1	1	0	1	1	1	1	1	1	34	1	1	1	1	1	1	1	1	1	1	1	1	1	1	1	1	1	1	1	1
SCoT 12_2	0	0	0	0	0	0	0	0	0	1	1	0	1	0	1	1	1	0	0	0	0	0	0	0	0	1	0	0	35	1	1	0	0	1	0	1	0	0	1	1	0	0	1	0	1	1	0	0	0
SCoT 12_3	0	0	0	0	0	0	0	0	0	0	0	0	0	0	0	0	0	0	1	0	0	0	0	0	0	0	0	1	36	0	0	0	0	1	1	0	0	0	0	0	0	0	0	0	0	0	0	0	1
SCoT 12_4	0	0	0	0	0	0	0	0	0	0	0	1	1	1	1	1	0	0	0	0	0	0	0	0	0	0	0	1	37	1	1	0	0	1	1	1	1	1	0	0	0	0	1	0	1	1	1	1	1
SCoT 12_5	1	1	0	0	1	1	1	1	1	1	1	1	1	1	1	1	1	1	1	1	1	0	1	1	1	1	1	1	38	1	1	1	1	1	1	1	1	1	1	1	1	1	1	1	1	1	1	1	1
SCoT 12_6	0	0	0	0	1	0	0	0	1	1	1	1	1	1	1	1	1	0	0	1	1	0	0	0	1	1	1	1	39	1	1	1	1	1	1	1	1	1	1	1	1	1	1	1	1	1	1	1	1
SCoT 12_7	1	1	0	1	1	1	1	1	1	1	1	1	1	1	1	1	1	1	1	1	1	0	1	1	1	1	1	1	40	1	1	1	1	1	1	1	1	1	1	1	1	1	1	1	1	1	1	1	1
SCoT 12_8	1	1	1	1	1	1	1	1	1	1	1	1	1	1	1	1	1	1	1	1	1	0	1	1	1	1	1	1	41	1	1	1	1	1	1	1	1	1	1	1	1	1	1	1	1	1	1	1	1
SCoT 12_9	1	1	1	1	1	1	1	1	1	1	1	1	1	1	1	1	1	1	1	1	1	0	1	1	1	1	1	1	42	1	1	1	1	1	1	1	1	1	1	1	1	1	1	1	1	1	1	1	1
SCoT 12_10	1	1	1	1	1	1	1	1	1	1	1	1	1	1	1	1	1	1	1	1	1	0	1	1	1	1	1	1	43	1	1	1	1	1	1	1	1	1	1	1	1	1	1	1	1	1	1	1	1
SCoT 12_11	1	1	0	1	1	1	1	1	1	1	1	1	1	1	1	1	1	1	1	1	1	0	1	1	1	1	1	1	44	1	1	1	1	1	1	1	1	1	1	1	1	1	1	1	1	1	1	1	1
SCoT 12_12	1	1	1	1	1	1	1	1	1	1	1	1	1	1	1	1	1	1	1	1	1	1	1	1	1	1	1	1	45	1	1	1	1	1	1	1	1	1	1	1	1	1	1	1	1	1	1	1	1
SCoT 12_13	1	1	1	1	1	1	1	1	1	1	1	1	0	1	1	1	1	1	1	1	1	1	1	1	1	1	1	1	46	1	1	1	1	1	1	1	1	1	1	1	1	1	1	1	1	1	1	1	1
SCoT 12_14	0	0	0	0	0	0	0	0	0	0	0	0	0	1	0	0	0	0	0	0	1	0	1	1	1	1	1	1	47	1	1	1	1	1	1	1	1	1	1	1	1	1	1	1	1	1	1	1	1
SCoT 12_15	1	1	1	1	1	1	1	1	1	1	1	1	1	1	1	1	1	1	1	1	1	1	1	1	1	1	1	1	48	1	1	1	1	1	1	1	1	1	1	1	1	1	1	1	1	1	1	1	1
SCoT 12_16	1	1	1	1	1	1	1	1	1	1	1	1	1	1	1	1	1	1	1	1	1	1	1	1	1	1	1	1	49	1	1	1	1	1	1	1	1	1	1	1	1	1	1	1	1	1	1	1	1
SCoT 12_17	0	0	0	0	0	0	0	0	0	0	0	0	0	0	0	0	0	0	0	0	0	0	0	0	0	0	0	0	50	0	0	1	0	0	0	0	0	0	0	0	0	0	0	0	0	1	1	0	0
SCoT 12_18	0	0	0	1	0	0	0	0	0	0	1	0	0	0	0	0	0	0	0	0	0	0	0	0	0	0	0	0	51	0	0	1	0	0	0	0	0	0	0	0	0	0	0	0	0	0	0	0	0
SCoT 12_19	1	1	1	1	1	1	1	1	1	1	1	1	1	1	1	1	1	1	1	1	1	1	1	1	1	1	1	1	52	1	1	1	1	1	1	1	1	1	1	1	1	1	1	1	1	1	1	1	1
SCoT 12_20	1	1	1	1	1	1	1	1	1	1	1	1	1	1	1	1	1	1	1	1	1	1	1	1	1	1	1	1	53	1	1	1	1	1	1	1	1	1	1	1	1	1	1	1	1	1	1	1	1
SCoT 12_21	0	1	1	1	0	1	0	0	1	1	1	1	1	1	1	1	1	1	1	1	1	1	1	1	1	1	1	1	54	1	1	1	1	1	1	1	1	1	1	1	1	1	1	1	1	1	1	1	1
SCoT 12_22	1	1	1	1	0	0	0	0	0	0	1	0	0	0	0	0	1	0	0	0	0	1	1	1	0	0	0	0	55	0	0	0	0	0	0	0	0	0	0	0	0	0	0	0	0	0	0	0	0
SCoT 12_23	1	1	1	1	0	0	0	0	0	0	1	0	0	0	0	0	1	0	0	0	0	1	1	1	0	0	0	0	56	0	0	0	0	0	0	0	0	0	0	0	0	0	0	0	0	0	0	0	0
SCoT 12_24	1	1	1	1	1	1	1	1	1	1	1	1	1	1	1	1	1	1	1	1	1	1	1	1	1	1	1	1	57	1	1	1	1	1	1	1	1	1	1	1	1	1	1	1	1	1	1	1	1
SCoT 12_25	1	1	1	1	1	1	0	0	1	1	1	1	1	1	1	1	1	1	1	1	1	1	1	1	1	1	1	1	58	1	1	1	1	1	1	1	1	1	1	1	1	1	1	1	1	1	1	1	1
SCoT 12_26	1	1	1	1	0	1	0	0	1	1	1	1	1	1	1	1	1	1	1	1	1	1	1	1	1	1	1	1	59	1	1	1	0	1	1	1	1	1	1	1	0	0	1	1	1	1	1	1	1
SCoT 12_27	0	0	0	0	0	0	0	0	0	0	0	0	0	0	0	0	0	0	0	0	0	1	0	0	0	0	0	0	60	0	0	1	0	0	0	0	0	0	0	0	0	0	0	0	0	0	0	0	0
SCoT 12_28	0	0	0	0	0	0	0	0	0	0	0	0	0	0	0	0	0	0	0	0	0	1	0	0	0	0	0	0	61	0	0	0	0	0	0	0	0	0	0	0	0	0	0	0	0	0	0	0	0
SCoT 13_1	0	0	0	0	0	0	0	1	1	1	1	1	1	1	1	1	1	1	1	1	1	0	1	0	1	1	1	1	62	1	1	0	0	1	1	1	1	1	1	1	1	0	1	1	1	0	0	1	0
SCoT 13_2	0	0	0	0	0	0	0	0	0	0	1	1	1	1	1	1	1	1	1	1	1	0	1	0	1	1	1	1	63	1	1	0	0	1	1	1	1	1	1	1	1	1	1	1	1	1	1	1	0
SCoT 13_3	0	0	0	0	0	0	0	0	0	0	1	1	1	1	1	1	1	1	1	1	1	0	1	1	1	1	1	1	64	1	1	1	1	1	1	1	1	1	1	1	1	1	1	1	1	1	1	1	1
SCoT 13_4	0	0	0	0	0	0	0	0	0	0	1	1	1	1	1	1	1	1	1	1	1	0	1	1	1	1	1	1	65	1	1	1	1	1	1	1	1	1	1	1	1	1	1	1	1	1	1	1	1
SCoT 13_5	0	0	0	0	0	0	1	1	1	1	1	1	1	1	1	1	1	1	1	1	1	0	1	1	1	1	1	1	66	1	1	0	0	1	1	1	1	1	1	1	1	1	1	1	1	1	1	1	1
SCoT 13_6	0	0	0	0	0	0	1	1	1	1	1	1	1	1	1	1	1	1	1	1	1	0	1	1	1	1	1	1	67	1	1	1	0	1	1	1	1	1	1	1	1	1	1	1	1	1	1	1	1
SCoT 13_7	0	0	0	0	0	0	1	1	1	1	1	1	1	1	1	1	1	1	1	1	1	0	1	1	1	1	1	1	68	1	1	1	1	1	1	1	1	1	1	1	1	1	1	1	1	1	1	1	1
SCoT 13_8	0	0	0	0	0	0	1	1	1	1	1	1	1	1	1	1	1	1	1	1	1	0	1	1	1	1	1	1	69	1	1	1	1	1	1	1	1	1	1	1	1	1	1	1	1	1	1	1	1
SCoT 13_9	0	0	0	0	1	1	1	1	1	1	1	1	1	1	1	1	1	1	1	1	1	1	1	1	1	1	1	1	70	1	1	1	1	1	1	1	1	1	1	1	1	1	1	1	1	1	1	1	1
SCoT 13_10	1	1	1	1	1	1	1	1	1	1	1	1	1	1	1	1	1	1	1	1	1	1	1	1	1	1	1	1	71	1	1	1	1	1	1	1	1	1	1	1	1	1	1	1	1	1	1	1	1
SCoT 13_11	1	0	0	1	1	1	1	1	1	1	1	1	1	1	1	1	1	1	1	1	1	1	1	1	1	1	1	1	72	1	1	1	1	1	1	1	1	1	1	1	1	1	1	1	1	1	1	1	1
SCoT 13_12	1	0	0	1	1	1	1	1	1	1	1	1	1	1	1	1	1	1	1	1	1	1	1	1	1	1	1	1	73	1	1	1	1	1	1	1	1	1	1	1	1	1	1	1	1	1	1	1	1
SCoT 13_13	1	1	0	0	1	1	1	1	1	1	1	1	1	1	1	1	1	1	1	1	1	1	1	1	1	1	1	1	74	1	1	1	1	1	1	1	1	1	1	1	1	1	1	1	1	1	1	1	1
SCoT 13_14	1	1	0	1	1	1	1	1	1	1	1	1	1	1	1	1	1	1	1	1	1	1	1	1	1	1	1	1	75	1	1	1	1	1	1	1	1	1	1	1	1	1	1	1	1	1	1	1	1
SCoT 13_15	1	1	0	1	1	1	1	1	1	1	1	1	1	1	1	1	1	1	1	1	1	1	1	1	1	1	1	1	76	1	1	1	1	1	1	1	1	1	1	1	1	1	1	1	1	1	1	1	1
SCoT 13_16	1	1	1	1	1	1	1	1	1	1	1	1	1	1	1	1	1	1	1	1	1	1	1	1	1	1	1	1	77	1	1	1	1	1	1	1	1	1	1	1	1	1	1	1	1	1	1	1	1
SCoT 13_17	0	0	0	0	1	1	1	1	1	1	1	1	1	1	1	1	1	1	1	1	1	1	1	1	1	1	1	1	78	1	1	1	1	1	1	1	1	1	1	1	1	1	1	1	1	1	1	1	1
SCoT 13_18	0	0	0	0	0	1	1	1	1	1	1	0	1	1	1	1	1	1	1	1	1	1	1	1	1	1	1	1	79	1	1	1	1	1	1	1	1	1	1	1	1	1	1	1	1	1	1	1	1
SCoT 13_19	0	0	0	0	0	0	1	1	1	1	1	0	1	1	1	1	1	1	1	1	1	1	1	1	1	1	1	1	80	1	1	1	1	1	1	1	1	1	1	1	1	1	1	1	1	1	1	1	1
SCoT 13_20	0	0	0	0	0	0	0	0	0	1	1	0	1	1	1	1	1	1	1	1	1	0	1	1	1	1	1	1	81	1	1	1	1	1	1	1	1	1	1	1	1	1	1	1	1	1	1	1	1
SCoT 13_21	0	0	0	0	0	0	0	0	0	0	0	0	0	0	0	0	1	0	0	0	0	0	1	1	0	0	0	0	82	0	0	0	0	1	0	0	0	0	0	0	0	0	0	0	1	0	0	0	0
SCoT 13_22	0	0	0	0	0	0	0	0	0	0	0	0	0	0	0	0	0	0	0	0	0	0	0	1	0	0	0	0	83	0	0	0	0	0	0	0	0	0	0	0	0	0	0	0	0	0	0	0	0
SCoT 18_1	1	0	0	0	1	1	1	1	1	1	1	1	1	1	1	1	1	1	1	1	1	1	1	1	1	1	1	1	84	1	1	1	1	1	1	1	1	1	1	1	1	1	1	1	1	1	1	1	1
SCoT 18_2	1	0	0	0	1	1	1	1	1	1	1	1	1	1	1	1	1	1	1	1	1	1	1	1	1	1	1	1	85	1	1	1	1	1	1	1	1	1	1	1	1	1	1	1	1	1	0	1	1
SCoT 18_3	1	1	0	0	1	1	1	1	1	1	1	1	1	1	1	1	1	1	1	1	1	1	1	1	1	1	1	1	86	1	1	1	1	1	1	1	1	1	1	1	1	1	1	1	1	1	1	1	1
SCoT 18_4	0	0	0	0	0	0	0	0	0	0	0	0	0	1	1	0	0	0	0	1	0	0	0	1	1	0	0	1	87	0	1	0	0	0	0	0	1	0	0	0	1	0	1	0	1	0	0	0	0
SCoT 18_5	1	1	0	1	1	1	1	1	1	1	1	1	1	1	1	1	1	1	1	1	1	1	1	1	1	1	1	1	88	1	1	1	1	1	1	1	1	1	1	1	1	1	1	1	1	1	1	1	1
SCoT 18_6	1	1	1	1	1	1	1	1	1	1	1	1	1	1	1	1	1	1	1	1	1	1	1	1	1	1	1	1	89	1	1	1	1	1	1	1	1	1	1	1	1	1	1	1	1	1	1	1	1
SCoT 18_7	1	1	0	0	1	1	1	1	1	1	1	1	1	1	1	1	1	1	1	1	1	1	1	1	1	1	1	1	90	1	1	1	1	1	1	1	1	1	1	1	1	1	1	1	1	1	1	1	1
SCoT 18_8	1	1	1	1	1	1	1	1	1	1	1	1	1	1	1	1	1	1	1	1	1	1	1	1	1	1	1	1	91	1	1	1	1	1	1	1	1	1	1	1	1	1	1	1	1	1	1	1	1
SCoT 18_9	1	1	0	0	0	0	0	1	0	0	1	0	0	0	0	0	0	0	0	0	0	0	0	0	0	0	0	0	92	0	0	0	0	0	0	0	0	0	0	0	1	1	0	0	0	0	0	0	0
SCoT 18_10	0	0	0	1	0	0	1	0	0	0	1	0	0	0	0	0	0	0	0	0	0	0	0	0	0	0	0	0	93	0	0	0	0	0	0	0	0	0	0	0	0	0	0	0	0	0	0	0	0
SCoT 18_11	1	1	1	1	1	1	0	0	1	1	1	1	1	1	1	1	1	1	1	1	1	1	1	1	1	1	1	1	94	1	1	1	1	1	1	1	1	1	1	1	0	0	1	1	1	1	1	1	1
SCoT 18_12	1	1	0	0	1	1	1	1	1	1	1	1	1	1	1	1	1	1	1	1	1	1	1	1	1	1	1	1	95	1	1	1	1	1	1	1	1	1	1	1	1	1	1	1	1	1	1	1	1
SCoT 18_13	0	0	0	0	0	0	1	1	0	0	1	0	0	0	0	0	0	0	0	0	0	0	0	0	0	0	0	0	96	0	0	0	0	0	0	0	0	0	0	0	1	1	0	0	0	0	0	0	0
SCoT 18_14	1	1	1	1	1	1	0	0	1	1	0	1	1	1	1	1	1	1	1	1	1	1	1	1	1	1	1	1	97	1	1	1	1	1	1	1	1	1	1	1	0	0	1	1	1	1	1	1	1
SCoT 18_15	0	0	0	0	0	0	1	1	0	0	0	0	0	0	0	0	0	0	0	0	0	0	0	0	0	0	0	0	98	0	0	0	0	0	0	0	0	0	0	0	0	0	0	0	0	0	0	0	0
SCoT 18_16	0	0	0	0	0	0	0	1	0	0	1	0	0	0	0	0	0	0	0	0	0	0	0	1	0	0	0	0	99	0	1	0	0	1	1	0	1	1	0	0	1	1	0	0	0	0	0	0	0
SCoT 18_17	0	0	0	0	1	1	0	1	1	1	1	1	1	1	1	1	1	1	1	1	1	1	1	1	1	1	1	1	100	1	1	0	1	1	1	1	1	1	1	1	1	1	1	1	1	1	0	1	1
SCoT 18_18	0	0	0	0	1	1	0	0	1	1	0	1	1	1	1	1	1	1	1	1	1	1	1	1	1	1	1	1	101	1	1	1	1	1	1	1	1	1	1	1	0	0	1	1	1	1	1	1	1
SCoT 18_19	0	0	0	0	0	0	0	0	0	0	1	0	0	0	0	0	0	0	0	0	0	0	0	0	0	0	0	0	102	0	0	0	0	0	0	0	0	0	0	0	0	0	0	0	0	0	0	0	0
SCoT 19_1	0	0	0	0	0	0	0	0	0	0	1	0	0	0	0	0	0	0	0	0	0	0	0	0	0	0	0	0	103	0	0	0	0	0	0	0	0	0	0	0	1	1	0	0	0	0	0	0	0
SCoT 19_2	1	1	1	1	1	1	1	1	1	1	1	1	1	1	1	1	1	1	1	1	1	0	1	1	1	1	1	1	104	1	1	1	1	1	1	1	1	1	1	1	1	1	1	1	1	1	1	1	1
SCoT 19_3	0	0	0	0	0	0	0	1	0	0	1	0	0	1	0	0	0	0	0	0	0	0	0	0	0	0	0	0	105	0	0	0	0	0	0	0	0	0	0	0	1	1	0	0	0	0	0	0	0
SCoT 19_4	0	0	0	0	0	0	0	0	0	0	0	1	1	1	1	1	1	1	1	1	1	0	1	1	1	1	1	1	106	1	1	1	1	1	1	1	1	1	1	1	1	1	1	1	1	1	1	1	1
SCoT 19_5	1	1	1	1	1	1	1	1	1	1	1	1	1	1	1	1	1	1	1	1	1	1	1	1	1	1	1	1	107	1	1	1	1	1	1	1	1	1	1	1	1	1	1	1	1	1	1	1	1
SCoT 22_1	0	0	0	0	0	0	0	0	0	0	0	0	0	1	1	0	0	0	0	0	0	0	0	0	0	1	1	1	108	0	0	0	0	0	0	0	0	0	0	0	0	0	0	0	0	0	0	0	0
SCoT 22_2	0	0	0	0	0	0	0	0	0	0	1	1	0	1	1	0	0	0	0	0	0	0	1	0	0	1	1	1	109	1	0	1	0	1	0	0	0	0	0	0	0	0	0	0	0	0	0	0	0
SCoT 22_3	1	0	0	0	0	0	0	0	0	0	0	1	0	1	1	0	0	0	0	1	1	0	1	1	1	1	1	1	110	1	0	0	0	1	0	0	0	0	0	0	0	0	1	0	1	0	0	0	0
SCoT 22_4	0	0	0	0	0	0	0	0	0	0	0	0	0	0	0	0	0	0	0	0	0	0	0	0	0	0	0	0	111	0	0	0	0	1	0	0	0	0	0	0	0	0	0	0	0	0	0	0	0
SCoT 22_5	0	0	1	1	0	0	0	0	0	0	0	0	0	0	0	0	0	0	0	0	0	1	0	0	0	0	0	0	112	0	0	1	1	0	0	0	0	0	0	0	0	0	0	0	0	0	0	0	1
SCoT 22_6	0	0	0	0	0	0	0	0	0	0	1	1	0	1	1	0	0	0	0	1	1	1	1	1	1	1	1	1	113	1	0	1	1	1	0	0	0	0	0	0	0	0	1	0	1	0	0	0	0
SCoT 22_7	0	0	0	0	0	0	0	0	0	0	1	0	0	0	0	0	0	0	0	0	0	0	0	1	0	0	0	0	114	0	0	0	0	1	0	0	0	0	0	0	0	0	0	0	0	0	0	0	0
SCoT 22_8	0	0	0	0	0	0	0	0	0	0	1	1	0	1	1	0	0	0	0	0	0	0	1	0	0	0	0	0	115	0	0	0	0	1	0	0	0	0	0	0	0	0	0	0	0	0	0	1	1
SCoT 22_9	0	0	0	0	0	0	0	0	0	0	1	0	0	0	0	0	0	0	0	1	0	0	0	0	0	0	0	0	116	0	0	0	0	1	0	0	0	0	0	0	0	0	0	0	0	0	0	0	0
SCoT 22_10	0	0	0	0	0	0	0	0	0	0	0	0	0	0	0	0	0	0	0	1	0	0	0	0	0	0	0	0	117	0	0	1	0	1	0	0	0	0	0	0	0	0	0	0	0	0	0	0	0
SCoT 22_11	1	1	1	0	0	1	0	0	1	0	0	1	1	1	1	1	0	0	1	1	1	1	1	1	1	1	1	1	118	1	0	1	1	1	1	1	1	1	0	0	0	0	1	1	1	0	0	1	1
SCoT 22_12	1	1	1	1	1	1	1	1	1	1	1	1	1	1	1	1	0	1	1	1	1	1	1	1	1	1	1	1	119	1	1	1	1	1	1	1	1	1	1	1	1	1	1	1	1	1	1	1	1
SCoT 22_13	0	0	1	1	0	0	1	1	1	1	1	1	1	1	1	1	0	1	1	1	1	1	1	1	1	1	1	1	120	1	1	1	1	1	1	1	1	1	1	1	1	1	1	1	1	1	1	1	1
SCoT 22_14	0	0	0	0	0	0	0	0	0	0	0	0	0	0	0	0	0	0	0	0	0	1	0	0	0	0	0	0	121	0	0	0	0	0	0	0	0	0	0	0	0	0	0	0	0	0	0	0	0
SCoT 22_15	0	0	0	0	0	0	1	0	0	0	0	0	0	0	0	0	0	0	0	0	0	1	0	0	0	0	0	0	122	0	0	0	0	0	0	0	0	0	0	1	0	0	0	0	0	0	0	0	0
SCoT 22_16	0	0	0	0	0	0	0	0	0	0	0	0	0	0	0	0	0	0	0	0	0	1	0	0	0	0	0	0	123	0	0	0	0	0	0	0	0	0	0	0	0	0	0	0	0	0	0	0	0
SCoT 29_1	1	1	1	1	1	1	1	1	1	1	1	1	1	1	1	1	1	1	1	1	1	1	1	1	1	1	1	1	124	1	1	1	1	1	1	1	1	1	1	1	1	1	1	1	1	1	1	1	1
SCoT 29_2	1	0	0	0	0	0	1	0	0	0	0	0	0	0	0	0	0	0	0	0	0	0	0	0	0	0	0	0	125	0	0	0	0	0	0	0	0	0	0	0	0	0	0	0	0	0	0	0	0
SCoT 30_1	0	0	0	0	0	0	0	0	0	0	1	1	0	1	1	0	1	0	0	1	1	0	1	1	1	1	1	1	126	1	0	0	0	1	0	1	1	0	0	0	0	0	1	0	1	0	0	0	0
SCoT 30_2	0	0	0	0	0	0	0	0	0	0	1	0	1	1	0	0	1	0	0	1	1	0	1	1	1	1	1	1	127	1	0	0	0	1	0	1	0	0	0	0	0	0	1	0	0	0	0	0	0
SCoT 30_3	0	0	0	0	0	0	0	0	0	0	1	1	0	1	1	0	1	0	0	1	1	0	1	1	1	1	1	1	128	1	0	0	0	1	0	1	1	0	0	0	0	0	1	0	1	0	0	0	0
SCoT 30_4	1	0	0	0	0	0	0	0	0	0	1	0	0	0	0	0	0	0	0	0	0	0	0	0	0	0	0	0	129	0	0	1	1	0	0	0	0	0	0	0	0	0	0	0	0	0	0	0	0
SCoT 30_5	0	0	0	0	0	0	0	0	0	0	0	0	0	0	0	0	0	0	0	0	0	0	0	0	0	0	0	0	130	0	0	0	0	0	0	0	0	0	0	0	0	0	0	0	0	1	1	0	0
SCoT 30_6	1	0	0	0	0	0	0	0	0	0	1	0	0	0	0	0	0	0	0	0	0	0	0	1	0	0	0	0	131	0	0	0	0	0	0	0	0	0	0	0	0	0	0	0	0	0	0	0	0
SCoT 30_7	0	0	0	0	0	0	0	0	0	0	0	1	1	1	1	1	1	0	0	1	1	0	0	1	1	1	1	1	132	1	0	1	1	1	0	1	1	1	1	0	1	1	1	0	1	1	0	1	0
SCoT 30_8	1	0	0	0	0	0	0	0	0	0	0	0	0	0	0	0	0	0	0	0	0	0	0	0	0	0	0	0	133	0	0	1	1	0	0	0	0	0	0	0	0	0	0	0	0	0	0	0	0
SCoT 30_9	1	0	0	0	0	0	0	0	0	0	0	0	0	0	0	0	0	0	0	0	0	0	0	0	0	0	0	0	134	0	0	0	1	0	0	0	0	0	0	0	1	1	0	0	1	0	0	0	0
SCoT 30_10	0	0	0	0	0	0	1	0	0	0	0	0	0	0	0	0	0	0	0	0	0	0	0	0	0	0	0	0	135	0	0	0	0	0	0	0	0	0	0	0	1	0	0	0	0	0	0	0	0
SCoT 30_11	1	1	1	1	1	1	1	1	1	1	1	1	1	1	1	1	1	1	1	1	1	1	1	1	1	1	1	1	136	1	1	1	1	1	1	1	1	1	1	1	1	1	1	1	1	1	1	1	1
SCoT 30_12	1	1	1	1	1	1	0	1	0	0	0	0	1	0	0	0	0	1	1	0	0	0	0	0	0	0	0	1	137	0	0	1	1	0	0	0	0	0	1	1	1	0	0	0	1	1	1	1	1
SCoT 34_1	1	1	0	0	1	1	1	1	1	0	1	1	1	1	1	1	1	1	1	1	1	1	1	1	1	1	1	1	138	1	1	1	1	1	1	1	1	1	1	1	1	1	1	1	1	1	1	1	1
SCoT 34_2	1	1	0	0	1	1	0	0	0	0	0	0	0	0	0	0	0	0	0	0	0	0	0	0	0	0	0	0	139	0	0	0	0	0	0	0	0	0	0	0	1	1	0	0	0	0	0	0	0
SCoT 34_3	0	0	0	0	0	0	1	1	1	1	1	1	1	1	1	1	1	1	1	1	1	1	1	1	1	1	1	1	140	1	1	1	1	1	1	1	1	1	1	1	1	1	1	1	1	1	1	1	1
SCoT 34_4	0	0	0	0	0	0	1	1	0	0	1	0	0	0	0	0	0	0	0	0	0	0	0	0	0	0	0	0	141	0	0	0	0	0	0	0	0	0	0	0	1	1	0	0	0	0	0	0	0
SCoT 34_5	1	1	1	1	1	1	0	1	1	1	1	1	1	1	1	1	1	1	1	1	1	1	1	1	1	1	1	1	142	1	1	1	1	1	1	1	1	1	1	1	1	1	1	1	1	1	1	1	1
SCoT 34_6	1	1	1	1	1	1	0	0	1	0	0	1	1	1	1	1	1	1	1	1	1	1	1	1	1	1	1	1	143	1	1	1	1	1	1	1	1	1	1	1	0	0	1	1	1	1	1	1	1
SCoT 34_7	1	0	1	0	0	1	1	1	0	0	1	0	0	0	0	0	0	0	0	0	0	0	0	0	0	0	0	0	144	0	0	0	0	0	0	0	0	0	0	0	1	1	0	0	0	0	0	0	0
SCoT 34_8	0	0	0	1	1	0	1	0	0	0	1	0	0	0	0	0	0	0	0	0	0	0	0	0	0	0	0	1	145	1	1	1	0	0	0	1	1	1	1	1	1	1	1	1	0	0	0	0	0
SCoT 34_9	0	0	0	0	0	0	1	1	0	0	1	0	0	0	0	0	1	0	0	0	0	1	0	0	0	0	0	0	146	0	0	1	0	0	0	1	1	0	0	0	1	1	1	1	1	1	1	1	1
SCoT 34_10	1	1	1	1	1	1	0	0	1	1	1	1	1	1	1	1	1	1	1	1	1	1	1	1	1	1	1	1	147	1	1	1	1	1	1	1	1	1	1	1	0	0	1	1	1	1	1	1	1
SCoT 34_11	1	1	1	1	1	1	0	0	1	1	1	1	1	1	1	1	1	1	1	1	1	1	1	1	1	1	1	1	148	1	1	1	1	1	1	1	1	1	1	1	1	1	1	1	1	1	1	1	1
SCoT 34_12	1	1	1	1	1	1	1	1	1	1	1	1	1	1	1	1	1	1	1	1	1	1	1	1	1	1	1	1	149	1	1	1	1	1	1	1	1	1	1	1	1	1	1	1	1	1	1	1	1
SCoT 34_13	1	1	1	1	1	1	1	1	1	1	1	1	1	1	1	1	1	1	1	1	1	1	1	1	1	1	1	1	150	1	1	1	1	1	1	1	1	1	1	1	1	1	1	1	1	1	1	1	1
SCoT 34_14	1	1	1	1	1	1	1	1	1	1	1	1	1	1	1	1	1	1	1	1	1	1	1	1	1	1	1	1	151	1	1	1	1	1	1	1	1	1	1	1	1	1	1	1	1	1	1	1	1
SCoT 34_15	0	0	0	0	0	0	0	0	0	0	1	0	0	0	0	0	0	0	0	0	0	0	0	0	0	0	0	0	152	0	0	0	0	0	0	0	0	0	0	0	1	1	0	0	0	0	0	0	0
	1	2	3	4	5	6	7	8	9	10	11	12	13	14	15	16	17	18	19	20	21	22	23	24	25	26	27	28
[truncated: 11 more columns]
